# Supplementary material for: Fecal microbiome in dogs with inflammatory bowel disease and intestinal lymphoma
Source: PubMed Central journal article supplement — J Vet Med Sci. 2017 Oct 6;79(11):1840–7. doi: 10.1292/jvms.17-0045 (PMC5709562; doi:10.1292/jvms.17-0045), 2017-10-06
Supplement: jvms-79-1840-s001.pdf [file jvms-79-1840-s001.pdf]

Table S1. Additional information on the dogs with inflammatory bowel disease (IBD) and intestinal lymphoma

| Group               | Histologic diagnosis               | IHC for CD3 and CD20 | PARR of <i>IgH</i> and <i>TCR<math>\gamma</math></i> | Antibiotic-free interval (weeks) | The number of Tregs (cells/62500 cm <sup>2</sup> Treg density |           |
|---------------------|------------------------------------|----------------------|------------------------------------------------------|----------------------------------|---------------------------------------------------------------|-----------|
| IBD                 | Lymphocytes plasma cells enteritis | Mixed                | Negative                                             | 2                                | 8.291822302                                                   | Reference |
|                     | Lymphocytes plasma cells enteritis | Mixed                | Negative                                             | >2                               | 0.113080726                                                   | Low       |
|                     | Lymphocytes plasma cells enteritis | Mixed                | Negative                                             | 2                                | 0.171368093                                                   | Low       |
|                     | Lymphocytes plasma cells enteritis | Mixed                | Negative                                             | 2                                | 0.048389594                                                   | Low       |
|                     | Lymphocytes plasma cells enteritis | Mixed                | Negative                                             | 2                                | 1.629655382                                                   | Reference |
|                     | Lymphocytes plasma cells enteritis | Mixed                | Negative                                             | >2                               | 7.971971843                                                   | Reference |
|                     | Lymphocytes plasma cells enteritis | Mixed                | Negative                                             | 2                                | 1.32545789                                                    | Reference |
|                     | Lymphocytes plasma cells enteritis | Mixed                | Negative                                             | >2                               | 0                                                             | Low       |
| Intestinal lymphoma | Large cell lymphoma                | CD20+                | <i>IgH</i> +                                         | >2                               | 4.648675018                                                   | Reference |
|                     | Large cell lymphoma                | CD3+                 | <i>TCR<math>\gamma</math></i> +                      | 2                                | 11.67268904                                                   | High      |
|                     | Small cell lymphoma                | CD3+                 | <i>TCR<math>\gamma</math></i> +                      | >2                               | 4.466981142                                                   | Reference |
|                     | Small cell lymphoma                | CD3+                 | <i>TCR<math>\gamma</math></i> +                      | 2                                | 6.908173669                                                   | Reference |
|                     | Small cell lymphoma                | CD3+                 | <i>TCR<math>\gamma</math></i> +                      | 2                                | 5.250599301                                                   | Reference |
|                     | Small cell lymphoma                | CD3+                 | <i>TCR<math>\gamma</math></i> +                      | 2                                | 11.67268904                                                   | High      |
|                     | Small cell lymphoma                | CD3+                 | <i>TCR<math>\gamma</math></i> +                      | 2                                | 20.03738698                                                   | High      |
|                     | Small cell lymphoma                | CD3+                 | <i>TCR<math>\gamma</math></i> +                      | 2                                | 28.18145266                                                   | High      |

IHC, immunohistochemistry; PARR, polymerase chain reaction for antigen receptor gene rearrangement; Treg, regulatory T cell.

Table S2. Relative proportion of all bacterial taxa in this study

| Phylum         | Class          | Order           | Family                       | Medians % (min-max %)* of sequences |                                |                                |              | Number of dogs harboring taxa |                          |         |              |                     |                       |
|----------------|----------------|-----------------|------------------------------|-------------------------------------|--------------------------------|--------------------------------|--------------|-------------------------------|--------------------------|---------|--------------|---------------------|-----------------------|
|                |                |                 |                              | Healthy                             |                                | IBD                            |              | Intestinal lymphoma           | Kruskal-Wallis P value** | Healthy | IBD          | Intestinal lymphoma | $\chi^2$ test P value |
|                |                |                 |                              | Genus                               |                                |                                |              |                               |                          |         |              |                     |                       |
| Actinobacteria |                |                 |                              | 0.05 (0.00-1.02)                    | 0.11 (0.02-8.81)               | 0.05 (0.01-0.13)               | 0.383        | 15                            | 8                        | 8       | 1.000        |                     |                       |
|                | Actinobacteria |                 |                              | 0.05 (0.00-1.02)                    | 0.10 (0.02-8.81)               | 0.05 (0.01-0.13)               | 0.436        | 15                            | 8                        | 8       | 1.000        |                     |                       |
|                |                | Actinomycetales |                              | 0.02 (0.00-0.07)                    | 0.03 (0.01-0.11)               | 0.01 (0.00-0.05)               | 0.271        | 15                            | 8                        | 6       | <b>0.046</b> |                     |                       |
|                |                |                 | Actinomycetaceae             | 0.00 (0.00-0.04)                    | 0.01 (0.00-0.03)               | 0.00 (0.00-0.00)               | 0.057        | 11                            | 7                        | 3       | 0.082        |                     |                       |
|                |                |                 | <i>Actinomyces</i>           | 0.00 <sup>ab</sup> (0.00-0.02)      | 0.00 <sup>a</sup> (0.00-0.02)  | 0.00 <sup>b</sup> (0.00-0.00)  | <b>0.037</b> | 11                            | 7                        | 2       | <b>0.020</b> |                     |                       |
|                |                |                 | <i>Parascardovia</i>         | 0.00 (0.00-0.01)                    | 0.00 (0.00-0.01)               | 0.00 (0.00-0.00)               | 0.252        | 5                             | 4                        | 0       | 0.078        |                     |                       |
|                |                |                 | Corynebacteriaceae           | 0.00 (0.00-0.03)                    | 0.01 (0.00-0.08)               | 0.00 (0.00-0.03)               | 0.806        | 12                            | 7                        | 6       | 0.815        |                     |                       |
|                |                |                 | <i>Corynebacterium</i>       | 0.00 (0.00-0.03)                    | 0.01 (0.00-0.08)               | 0.00 (0.00-0.03)               | 0.806        | 12                            | 7                        | 6       | 0.815        |                     |                       |
|                |                |                 | Microbacteriaceae            | 0.00 (0.00-0.02)                    | 0.00 (0.00-0.01)               | 0.00 (0.00-0.01)               | 0.985        | 7                             | 4                        | 2       | 0.524        |                     |                       |
|                |                |                 | <i>Leucobacter</i>           | 0.00 (0.00-0.02)                    | 0.00 (0.00-0.01)               | 0.00 (0.00-0.01)               | 0.992        | 6                             | 4                        | 2       | 0.585        |                     |                       |
|                |                |                 | Bifidobacteriales            | 0.02 (0.00-1.01)                    | 0.05 (0.01-8.73)               | 0.02 (0.00-0.12)               | 0.653        | 14                            | 8                        | 8       | 0.576        |                     |                       |
|                |                |                 | Bifidobacteriaceae           | 0.02 (0.00-1.01)                    | 0.05 (0.01-8.73)               | 0.02 (0.00-0.12)               | 0.653        | 14                            | 8                        | 8       | 0.576        |                     |                       |
|                |                |                 | <i>Bifidobacterium</i>       | 0.02 (0.00-1.01)                    | 0.05 (0.01-8.73)               | 0.02 (0.00-0.12)               | 0.653        | 14                            | 8                        | 8       | 0.576        |                     |                       |
|                |                |                 | Nitrospirales                | 0.00 (0.00-0.00)                    | 0.00 (0.00-0.07)               | 0.00 (0.00-0.00)               | 0.146        | 4                             | 4                        | 0       | 0.073        |                     |                       |
|                |                |                 | Euzeybiales                  | 0.00 (0.00-0.00)                    | 0.00 (0.00-0.07)               | 0.00 (0.00-0.00)               | 0.146        | 4                             | 4                        | 0       | 0.073        |                     |                       |
|                |                |                 | Euzeybiaceae                 | 0.00 (0.00-0.00)                    | 0.00 (0.00-0.07)               | 0.00 (0.00-0.00)               | 0.146        | 4                             | 4                        | 0       | 0.073        |                     |                       |
|                |                |                 | <i>Euzeybia</i>              | 0.00 (0.00-0.00)                    | 0.00 (0.00-0.07)               | 0.00 (0.00-0.00)               | 0.146        | 4                             | 4                        | 0       | 0.073        |                     |                       |
| Bacteroidetes  |                |                 |                              | 1.24 (0.10-21.34)                   | 0.49 (0.18-13.13)              | 2.34 (0.07-25.94)              | 0.997        | 15                            | 8                        | 8       | 1.000        |                     |                       |
|                | Bacteroidia    |                 |                              | 1.24 (0.10-21.34)                   | 0.49 (0.18-13.13)              | 2.34 (0.07-25.94)              | 0.997        | 15                            | 8                        | 8       | 1.000        |                     |                       |
|                |                | Bacteroidales   |                              | 1.24 (0.10-21.34)                   | 0.49 (0.18-13.13)              | 2.34 (0.07-25.94)              | 0.997        | 15                            | 8                        | 8       | 1.000        |                     |                       |
|                |                |                 | Bacteroidaceae               | 1.21 (0.05-21.22)                   | 0.34 (0.14-13.07)              | 1.53 (0.04-25.53)              | 0.991        | 15                            | 8                        | 8       | 1.000        |                     |                       |
|                |                |                 | <i>Bacteroides</i>           | 1.17 (0.05-20.88)                   | 0.34 (0.14-13.06)              | 1.50 (0.04-25.09)              | 0.991        | 15                            | 8                        | 8       | 1.000        |                     |                       |
|                |                |                 | Porphyromonadaceae           | 0.00 <sup>a</sup> (0.00-0.19)       | 0.00 <sup>ab</sup> (0.00-0.01) | 0.14 <sup>b</sup> (0.00-3.93)  | <b>0.016</b> | 10                            | 8                        | 8       | <b>0.042</b> |                     |                       |
|                |                |                 | <i>Parabacteroides</i>       | 0.00 <sup>a</sup> (0.00-0.19)       | 0.00 <sup>ab</sup> (0.00-0.01) | 0.14 <sup>b</sup> (0.00-3.92)  | <b>0.013</b> | 10                            | 5                        | 8       | 0.150        |                     |                       |
|                |                |                 | <i>Porphyromonas</i>         | 0.00 <sup>a</sup> (0.00-0.00)       | 0.00 <sup>b</sup> (0.00-0.00)  | 0.00 <sup>ab</sup> (0.00-0.01) | <b>0.011</b> | 2                             | 7                        | 2       | <b>0.000</b> |                     |                       |
|                |                |                 | Prevotellaceae               | 0.00 (0.00-0.10)                    | 0.00 (0.00-0.41)               | 0.00 (0.00-0.01)               | 0.925        | 14                            | 7                        | 6       | 0.458        |                     |                       |
|                |                |                 | Paraprevotellaceae           | 0.01 <sup>a</sup> (0.00-1.38)       | 0.06 <sup>b</sup> (0.00-7.23)  | 0.01 <sup>ab</sup> (0.00-0.03) | <b>0.034</b> | 13                            | 8                        | 8       | 0.320        |                     |                       |
|                |                |                 | <i>Prevotella</i>            | 0.02 (0.00-1.44)                    | 0.06 (0.00-7.23)               | 0.02 (0.00-0.03)               | 0.109        | 15                            | 8                        | 8       | 1.000        |                     |                       |
| Firmicutes     |                |                 |                              | 97.08 (65.28-99.64)                 | 97.60 (67.62-99.31)            | 86.17 (72.78-99.74)            | 0.528        | 15                            | 8                        | 8       | 1.000        |                     |                       |
|                | Bacilli        |                 |                              | 0.54 (0.28-77.59)                   | 22.90 (0.62-66.43)             | 11.40 (0.66-46.32)             | 0.146        | 15                            | 8                        | 8       | 1.000        |                     |                       |
|                |                | Bacillales      |                              | 0.00 (0.00-0.09)                    | 0.01 (0.00-0.04)               | 0.01 (0.00-0.15)               | 0.556        | 11                            | 7                        | 6       | 0.728        |                     |                       |
|                |                |                 | Staphylococcaceae            | 0.00 (0.00-0.09)                    | 0.01 (0.00-0.04)               | 0.01 (0.00-0.15)               | 0.324        | 11                            | 7                        | 6       | 0.728        |                     |                       |
|                |                |                 | <i>Staphylococcus</i>        | 0.00 (0.00-0.03)                    | 0.00 (0.00-0.01)               | 0.00 (0.00-0.01)               | 0.911        | 4                             | 2                        | 4       | 0.458        |                     |                       |
|                |                |                 | Lactobacillales              | 0.45 (0.26-77.57)                   | 22.87 (0.55-65.77)             | 11.20 (0.55-46.28)             | 0.096        | 15                            | 8                        | 8       | 1.000        |                     |                       |
|                |                |                 | Aerococcaceae                | 0.00 (0.00-0.02)                    | 0.00 (0.00-0.01)               | 0.00 (0.00-0.06)               | 0.736        | 3                             | 4                        | 4       | 0.218        |                     |                       |
|                |                |                 | Enterococcaceae              | 0.13 (0.01-77.35)                   | 0.19 (0.01-36.49)              | 0.59 (0.11-45.60)              | 0.470        | 15                            | 8                        | 8       | 1.000        |                     |                       |
|                |                |                 | <i>Enterococcus</i>          | 0.08 (0.01-67.65)                   | 0.12 (0.00-29.75)              | 0.42 (0.06-35.59)              | 0.503        | 15                            | 8                        | 8       | 1.000        |                     |                       |
|                |                |                 | Lactobacillaceae             | 0.05 (0.00-0.25)                    | 0.07 (0.03-3.52)               | 0.07 (0.01-17.62)              | 0.793        | 14                            | 8                        | 8       | 0.576        |                     |                       |
|                |                |                 | <i>Lactobacillus</i>         | 0.03 (0.00-0.14)                    | 0.04 (0.01-3.46)               | 0.03 (0.00-1.45)               | 0.962        | 13                            | 8                        | 8       | 0.320        |                     |                       |
|                |                |                 | <i>Pediococcus</i>           | 0.00 (0.00-0.00)                    | 0.00 (0.00-0.00)               | 0.00 (0.00-2.37)               | 0.065        | 2                             | 4                        | 6       | <b>0.011</b> |                     |                       |
|                |                |                 | Streptococcaceae             | 0.15 (0.08-62.34)                   | 10.36 (0.19-65.71)             | 0.52 (0.21-32.64)              | 0.057        | 15                            | 8                        | 8       | 1.000        |                     |                       |
|                |                |                 | <i>Lactococcus</i>           | 0.00 (0.00-0.03)                    | 0.00 (0.00-0.00)               | 0.00 (0.00-0.01)               | 0.999        | 5                             | 4                        | 2       | 0.563        |                     |                       |
|                |                |                 | <i>Streptococcus</i>         | 0.14 (0.07-59.77)                   | 9.96 (0.17-60.28)              | 0.48 (0.18-32.01)              | 0.062        | 15                            | 8                        | 8       | 1.000        |                     |                       |
|                |                |                 | Turicibacteriales            | 0.02 (0.00-0.69)                    | 0.02 (0.00-0.63)               | 0.03 (0.00-6.31)               | 0.992        | 15                            | 8                        | 8       | 1.000        |                     |                       |
|                |                |                 | Turicibacteraceae            | 0.02 (0.00-0.69)                    | 0.02 (0.00-0.63)               | 0.03 (0.00-6.31)               | 0.992        | 15                            | 8                        | 8       | 1.000        |                     |                       |
|                |                |                 | <i>Turicibacter</i>          | 0.02 (0.00-0.69)                    | 0.02 (0.00-0.63)               | 0.03 (0.00-6.31)               | 0.992        | 15                            | 8                        | 8       | 1.000        |                     |                       |
|                |                |                 | Clostridia                   | 92.41 (19.82-98.48)                 | 60.73 (30.59-94.55)            | 67.90 (28.76-81.08)            | 0.199        | 15                            | 8                        | 8       | 1.000        |                     |                       |
|                |                |                 | Clostridiales                | 85.50 (19.59-98.23)                 | 59.61 (30.15-89.62)            | 66.31 (28.13-79.11)            | 0.191        | 15                            | 8                        | 8       | 1.000        |                     |                       |
|                |                |                 | Clostridiaceae               | 7.72 (0.36-49.95)                   | 1.48 (0.18-50.95)              | 6.35 (0.47-57.59)              | 0.683        | 15                            | 8                        | 8       | 1.000        |                     |                       |
|                |                |                 | <i>Clostridium</i>           | 7.56 (0.35-46.24)                   | 0.71 (0.16-50.07)              | 6.33 (0.45-57.57)              | 0.570        | 15                            | 8                        | 8       | 1.000        |                     |                       |
|                |                |                 | <i>Sarcina</i>               | 0.00 (0.00-1.12)                    | 0.00 (0.00-0.82)               | 0.00 (0.00-0.01)               | 0.937        | 10                            | 5                        | 7       | 0.479        |                     |                       |
|                |                |                 | Eubacteriaceae               | 0.00 <sup>a</sup> (0.00-0.02)       | 0.01 <sup>b</sup> (0.00-0.24)  | 0.02 <sup>b</sup> (0.00-7.32)  | <b>0.003</b> | 5                             | 7                        | 8       | <b>0.002</b> |                     |                       |
|                |                |                 | <i>Eubacterium</i>           | 0.48 (0.02-11.74)                   | 0.63 (0.05-2.76)               | 1.84 (0.17-13.94)              | 0.377        | 15                            | 8                        | 8       | 1.000        |                     |                       |
|                |                |                 | Lachnospiraceae              | 53.05 (2.85-88.66)                  | 31.63 (20.61-73.43)            | 50.08 (4.47-69.98)             | 0.843        | 15                            | 8                        | 8       | 1.000        |                     |                       |
|                |                |                 | <i>Blautia</i>               | 29.99 (0.87-61.37)                  | 14.85 (10.25-52.26)            | 22.62 (1.30-48.34)             | 0.717        | 15                            | 8                        | 8       | 1.000        |                     |                       |
|                |                |                 | <i>Coproccoccus</i>          | 0.00 <sup>a</sup> (0.00-0.09)       | 0.00 <sup>ab</sup> (0.00-1.62) | 0.00 <sup>b</sup> (0.00-1.99)  | <b>0.013</b> | 5                             | 7                        | 8       | <b>0.002</b> |                     |                       |
|                |                |                 | <i>Dorea</i>                 | 0.03 (0.00-0.47)                    | 0.01 (0.00-0.06)               | 0.06 (0.00-0.47)               | 0.146        | 15                            | 8                        | 8       | 1.000        |                     |                       |
|                |                |                 | [ <i>Ruminococcus</i> ]      | 7.49 (0.89-19.61)                   | 4.73 (0.93-27.84)              | 2.36 (0.24-14.97)              | 0.653        | 15                            | 8                        | 8       | 1.000        |                     |                       |
|                |                |                 | Peptococcaceae               | 0.00 (0.00-0.01)                    | 0.00 (0.00-1.42)               | 0.01 (0.00-2.20)               | 0.261        | 11                            | 8                        | 8       | 0.086        |                     |                       |
|                |                |                 | <i>Peptococcus</i>           | 0.00 (0.00-0.01)                    | 0.00 (0.00-1.42)               | 0.01 (0.00-2.20)               | 0.538        | 11                            | 8                        | 8       | 0.086        |                     |                       |
|                |                |                 | Peptostreptococcaceae        | 2.98 (0.11-89.68)                   | 0.96 (0.09-36.61)              | 1.49 (0.22-3.74)               | 0.942        | 15                            | 8                        | 8       | 1.000        |                     |                       |
|                |                |                 | <i>Peptostreptococcus</i>    | 0.00 (0.00-0.07)                    | 0.00 (0.00-0.01)               | 0.00 (0.00-0.02)               | 0.999        | 12                            | 8                        | 5       | 0.164        |                     |                       |
|                |                |                 | Ruminococcaceae              | 0.06 (0.01-0.88)                    | 0.46 (0.03-23.57)              | 0.80 (0.05-7.69)               | 0.086        | 15                            | 8                        | 8       | 1.000        |                     |                       |
|                |                |                 | <i>Faecalibacterium</i>      | 0.01 (0.00-0.75)                    | 0.01 (0.00-1.77)               | 0.01 (0.00-3.14)               | 0.994        | 14                            | 8                        | 8       | 0.576        |                     |                       |
|                |                |                 | <i>Oscillospira</i>          | 0.00 <sup>a</sup> (0.00-0.34)       | 0.09 <sup>ab</sup> (0.00-6.48) | 0.11 <sup>b</sup> (0.01-2.54)  | <b>0.027</b> | 12                            | 8                        | 8       | 0.170        |                     |                       |
|                |                |                 | <i>Ruminococcus</i>          | 7.49 (0.89-19.61)                   | 4.73 (0.93-27.84)              | 2.36 (0.24-14.97)              | 0.653        | 15                            | 8                        | 8       | 1.000        |                     |                       |
|                |                |                 | Veillonellaceae              | 0.01 (0.00-2.67)                    | 0.01 (0.00-17.27)              | 0.08 (0.01-1.96)               | 0.545        | 15                            | 8                        | 8       | 1.000        |                     |                       |
|                |                |                 | <i>Megamonas</i>             | 0.00 (0.00-2.56)                    | 0.01 (0.00-0.53)               | 0.00 (0.00-0.01)               | 0.183        | 15                            | 8                        | 6       | <b>0.046</b> |                     |                       |
|                |                |                 | <i>Phascolarctobacterium</i> | 0.00 (0.00-0.01)                    | 0.00 (0.00-0.02)               | 0.00 (0.00-0.88)               | 0.076        | 7                             | 5                        | 8       | <b>0.039</b> |                     |                       |
|                |                |                 | <i>Veillonella</i>           | 0.00 (0.00-2.35)                    | 0.00 (0.00-17.02)              | 0.01 (0.01-1.93)               | 0.259        | 13                            | 6                        | 8       | 0.328        |                     |                       |
|                |                |                 | Coriobacteriales             | 0.02 (0.00-2.13)                    | 0.01 (0.00-9.35)               | 0.02 (0.00-0.53)               | 0.935        | 15                            | 7                        | 7       | 0.367        |                     |                       |
|                |                |                 | Coriobacteriaceae            | 0.02 (0.00-2.13)                    | 0.01 (0.00-9.35)               | 0.02 (0.00-0.53)               | 0.935        | 15                            | 7                        | 7       | 0.367        |                     |                       |
|                |                |                 | <i>Collinsella</i>           | 0.01 (0.00-2.12)                    | 0.01 (0.00-9.33)               | 0.00 (0.00-0.50)               | 0.259        | 15                            | 7                        | 6       | 0.147        |                     |                       |
|                |                |                 | Erysipelotrichi              | 0.77 (0.03-12.53)                   | 1.36 (0.24-3.00)               | 1.47 (0.12-14.98)              | 0.952        | 15                            | 8                        | 8       | 1.000        |                     |                       |
|                |                |                 | Erysipelotrichales           | 0.77 (0.03-12.53)                   | 1.36 (0.24-3.00)               | 1.47 (0.12-14.98)              | 0.952        | 15                            | 8                        | 8       | 1.000        |                     |                       |
|                |                |                 | Erysipelotrichaceae          | 0.57 (0.02-12.22)                   | 0.67 (0.04-2.83)               | 0.52 (0.11-14.06)              | 0.922        | 15                            | 8                        | 8       | 1.000        |                     |                       |
|                |                |                 | <i>Allobaculum</i>           | 0.02 (0.00-1.56)                    | 0.03 (0.00-0.64)               | 0.02 (0.01-0.04)               | 0.999        | 15                            | 8                        | 8       | 1.000        |                     |                       |
|                |                |                 | [ <i>Eubacterium</i> ]       | 0.48 (0.02-11.74)                   | 0.63 (0.05-2.76)               | 1.84 (0.17-13.94)              | 0.377        | 15                            | 8                        | 8       | 1.000        |                     |                       |
|                |                |                 | Coprobacillaceae             | 0.28 (0.01-4.00)                    | 0.52 (0.01-1.68)               | 0.51 (0.01-1.47)               | 0.998        | 15                            | 8                        | 8       | 1.000        |                     |                       |
|                |                |                 | <i>Catenibacterium</i>       | 0.00 (0.00-0.40)                    | 0.01 (0.00-1.65)               | 0.01 (0.00-0.56)               | 0.736        | 11                            | 7                        | 8       | 0.241        |                     |                       |
| Fusobacteria   |                |                 |                              | 0.09 (0.01-3.33)                    | 0.23 (0.06-14.08)              | 0.08 (0.01-5.36)               | 0.455        | 15                            | 8                        | 8       | 1.000        |                     |                       |
|                | Fusobacteria   |                 |                              | 0.09 (0.01-3.33)                    | 0.23 (0.06-14.08)              | 0.08 (0.01-5.36)               | 0.455        | 15                            | 8                        | 8       | 1.000        |                     |                       |
|                |                | Fusobacteriales |                              | 0.09 (0.01-3.33)                    | 0.23 (0.06-14.08)              | 0.08 (0.01-5.36)               | 0.455        | 15                            | 8                        | 8       | 1.000        |                     |                       |
|                |                |                 | Fusobacteriaceae             | 0.09 (0.01-3.33)                    | 0.23 (0.06-14.05)              | 0.08 (0.01-5.34)               | 0.455        | 15                            | 8                        | 8       | 1.000        |                     |                       |
|                |                |                 | <i>Fusobacterium</i>         | 0.00 (0.00-0.03)                    | 0.00 (0.00-0.03)               | 0.00 (0.00-0.03)               | 0.845        | 8                             | 6                        | 3       | 0.317        |                     |                       |
|                |                |                 | J2                           |                                     |                                |                                |              |                               |                          |         |              |                     |                       |
